# Supplementary material
Source: publisher site journal article supplement (http://www.kjim.org/upload/media/kjim-2021-427-suppl3.pdf)
Supplement: Supplementary file 1 [file kjim-2021-427-suppl3.pdf]

**Supplementary Table 3. Univariable analysis for predictors of recurrent acute myocardial infarction within 1 year**

| Variable                                          | Odds ratio (95% CI) | p value |
|---------------------------------------------------|---------------------|---------|
| Age ≥ 75 yr                                       | 1.639 (1.197–2.242) | 0.002   |
| Women                                             | 1.673 (1.249–2.240) | 0.001   |
| Heart rate > 100 beats/min                        | 1.492 (0.996–2.236) | 0.052   |
| Killip class III or IV                            | 1.982 (1.408–2.791) | < 0.001 |
| Hypotension (SBP < 100 mmHg)                      | 1.011 (0.627–1.629) | 0.965   |
| Hypertension                                      | 1.760 (1.320–2.347) | < 0.001 |
| Diabetes mellitus                                 | 1.804 (1.355–2.400) | < 0.001 |
| Dyslipidemia                                      | 1.140 (0.747–0.174) | 0.543   |
| Previous heart failure                            | 2.491 (1.003–6.187) | 0.049   |
| Previous CVA                                      | 1.497 (0.916–2.446) | 0.107   |
| Smoking                                           | 0.615 (0.466–0.812) | 0.001   |
| Renal dysfunction (Cr > 1.3 mg/dL)                | 2.090 (1.474–2.962) | < 0.001 |
| Obesity (BMI > 25 kg/m <sup>2</sup> )             | 1.007 (0.749–1.352) | 0.965   |
| Atypical chest pain                               | 1.936 (1.371–2.733) | < 0.001 |
| Family history of AMI                             | 1.215 (0.725–2.037) | 0.461   |
| Target lesion location                            |                     |         |
| LM                                                | 1.546 (0.891–2.683) | 0.121   |
| LAD                                               | 1.432 (1.030–1.990) | 0.033   |
| LCx                                               | 1.158 (0.877–1.530) | 0.301   |
| RCA                                               | 1.395 (1.050–1.854) | 0.022   |
| Multivessel disease                               | 1.787 (1.338–2.387) | < 0.001 |
| Post-TIMI flow < III                              | 0.779 (0.287–2.114) | 0.625   |
| Lesion type B2 or C                               | 1.414 (0.888–2.252) | 0.144   |
| ST elevation MI                                   | 0.891 (0.675–1.176) | 0.416   |
| Total ischemic time > 12 hr                       | 1.315 (0.996–1.737) | 0.054   |
| Ejection fraction < 50%                           | 1.413 (1.063–1.879) | 0.017   |
| Maximum troponin I > 51.3                         | 0.915 (0.650–1.290) | 0.613   |
| Atrial fibrillation                               | 1.341 (0.655–2.745) | 0.423   |
| LDL-C ≥ 70 mg/dL or ≤ 50% reduction from baseline | 1.486 (0.627–3.522) | 0.369   |
| Aspirin                                           | NA                  | 0.999   |
| Prasugrel or ticagrelor                           | 1.086 (0.806–1.462) | 0.589   |
| ACEi or ARB                                       | 0.731 (0.530–1.007) | 0.055   |
| Beta-blocker                                      | 0.821 (0.572–1.177) | 0.283   |
| Statin                                            | 0.552 (0.360–0.844) | 0.006   |

CI, confidence interval; SBP, systolic blood pressure; CVA, cerebrovascular accident; Cr, creatinine; BMI, body mass index; AMI, acute myocardial infarction; LM, left main coronary artery; LAD, left anterior descending coronary artery; LCx, left circumflex coronary artery; RCA, right coronary artery; TIMI, thrombolysis in myocardial infarction; MI, myocardial infarction; LDL-C, low-density lipoprotein cholesterol; NA, not applicable; ACEi, angiotensin-converting enzyme inhibitor; ARB, angiotensin receptor blocker.
